# Supplementary material for: OGRE: Overlap Graph-based metagenomic Read clustEring
Source: PubMed Central journal article supplement (PMC8128468; doi:10.1093/bioinformatics/btaa760), 2020-09-01
Supplement: btaa760_supplementary_data.pdf [file btaa760_supplementary_data.pdf]

## Appendix A: Characteristics of datasets

Table S1. Characteristics of seven CAMI datasets. \*Four out of the six CAMI datasets contain multiple samples. For these we only used samples S001. \*\*This is a relative complexity as indicated by ?, see their paper for further details.

| Dataset       | Sample*           | No. reads  | Read length (nt) | No. species | No. strains | Complexity** |
|---------------|-------------------|------------|------------------|-------------|-------------|--------------|
| CAMI mousegut | 5, 31, 33, 54, 57 | 80,080,460 | 2×150            | 405         | 544         | -            |
| CAMI_low      | -                 | 49,898,179 | 2×150            | 27          | 60          | Low          |
| CAMI_medium   | S001              | 66,489,042 | 2×150            | 91          | 232         | Medium       |
| CAMI_high     | S001              | 49,901,367 | 2×150            | 376         | 1074        | High         |
| toy_low       | -                 | 72,855,674 | 2×100            | 30          | 30          | Low          |
| toy_medium    | S001              | 77,155,802 | 2×100            | 199         | 225         | Medium       |
| toy_high      | S001              | 74,016,648 | 2×100            | 375         | 450         | High         |

Table S2. Characteristics of three small subsets of CAMI\_low.

| Subset ID  | Species included (CAMI OTU) | Coverage per species | No. strains per species | No. read pairs per species |
|------------|-----------------------------|----------------------|-------------------------|----------------------------|
| 2species_a | 220                         | 3                    | 1                       | 41,609                     |
|            | 294                         | 127                  | 2                       | 6,146,574                  |
| 2species_b | 294                         | 127                  | 2                       | 6,146,574                  |
|            | 340                         | 487                  | 1                       | 5,653,696                  |
| 4species   | 126                         | 22                   | 1                       | 191,369                    |
|            | 220                         | 3                    | 1                       | 41,609                     |
|            | 223                         | 98                   | 3                       | 1,346,963                  |
|            | 340                         | 487                  | 1                       | 5,653,696                  |

## Appendix B: Minimap2 parameter settings

Table S3. Clustering performance for various choices of parameters for Minimap2. The "base" case represents the set of parameters we chose, namely  $k = 21$ ,  $w = 11$ ,  $s = 60$ ,  $m = 60$ ,  $n = 2$ ,  $r = 0$ ,  $A = 4$ ,  $B = 2$ . As can be seen from the table, the choice of parameters determines the trade-off between having more reads clustered versus the cost of high runtime and memory usage on disk. sp. = species.

| Evaluation metric                | Base                          | $k = 17$ ,<br>$w = 9$ | $k = 25$ ,<br>$w = 15$ | $s = 40$ | $s = 80$ | $m = 80$ | $m = 40$ | $n = 1$ | $n = 4$ | $r = 2$ | $A = 6$ | $A = 2$ | $B = 1$ | $B = 4$ |
|----------------------------------|-------------------------------|-----------------------|------------------------|----------|----------|----------|----------|---------|---------|---------|---------|---------|---------|---------|
|                                  | % reads clustered for sp. 126 | 0.997                 | 0.999                  | 0.818    | 0.831    | 0.997    | 0.959    | 1.000   | 0.997   | 0.997   | 0.997   | 0.997   | 0.997   | 0.831   |
| % reads clustered for sp. 220    | 0.031                         | 0.066                 | 0.005                  | 0.026    | 0.031    | 0.001    | 0.125    | 0.031   | 0.029   | 0.031   | 0.030   | 0.033   | 0.026   | 0.032   |
| % reads clustered for sp. 223    | 0.999                         | 1.000                 | 0.838                  | 0.833    | 0.999    | 0.988    | 1.000    | 0.999   | 0.999   | 0.999   | 0.999   | 0.999   | 0.833   | 0.999   |
| % reads clustered for sp. 340    | 1.000                         | 1.000                 | 0.831                  | 0.833    | 1.000    | 0.993    | 1.000    | 1.000   | 1.000   | 1.000   | 1.000   | 1.000   | 0.833   | 1.000   |
| No. clusters with sp. 126        | 25                            | 22                    | 35                     | 25       | 25       | 178      | 11       | 25      | 25      | 25      | 25      | 25      | 25      | 25      |
| No. clusters with sp. 220        | 55                            | 111                   | 13                     | 55       | 55       | 1        | 204      | 55      | 51      | 53      | 52      | 58      | 55      | 56      |
| No. clusters with sp. 223        | 2                             | 2                     | 3                      | 2        | 2        | 6        | 2        | 2       | 2       | 3       | 2       | 2       | 2       | 2       |
| No. clusters with sp. 340        | 1                             | 1                     | 1                      | 1        | 1        | 6        | 1        | 1       | 1       | 1       | 1       | 1       | 1       | 1       |
| Mean no. sp. per cluster [range] | 1 [1,1]                       | 1 [1,1]               | 1 [1,1]                | 1 [1,1]  | 1 [1,1]  | 1 [1,1]  | 1 [1,4]  | 1 [1,1] | 1 [1,1] | 1 [1,1] | 1 [1,1] | 1 [1,1] | 1 [1,1] | 1 [1,1] |
| Total number of clusters         | 83                            | 136                   | 52                     | 83       | 83       | 191      | 218      | 83      | 79      | 82      | 80      | 86      | 83      | 84      |
| Size of overlap file             | 58G                           | 77G                   | 39G                    | 58G      | 58G      | 25G      | 110G     | 58G     | 58G     | 58G     | 58G     | 58G     | 59G     | 57G     |
| Runtime (mins)                   | 961                           | 1256                  | 439                    | 656      | 951      | 430      | 1652     | 936     | 936     | 936     | 938     | 927     | 670     | 923     |

## Appendix C: Coefficients obtained with logistic regression

Table S4. Logistic regression coefficients obtained with five training datasets. In each training set we included 10,000 same-species overlaps and 10,000 different-species overlaps from each of the datasets indicated in the first column. When applying OGRE to one of the datasets from the first CAMI challenge we used the training data that does not include the dataset that is to be clustered. When clustering the CAMI mousegut dataset we used the training dataset containing overlaps from CAMI\_medium, CAMI\_high, toy\_medium and toy\_high. We excluded the CAMI\_low data since this dataset contains very few species with multiple strains.

| Training data obtained from                  | Coefficient for |             |
|----------------------------------------------|-----------------|-------------|
|                                              | Overlap length  | Phred score |
| CAMI_medium, CAMI_high, toy_medium, toy_high | 0.0181          | 14.270      |
| CAMI_low, CAMI_high, toy_medium, toy_high    | 0.0318          | 16.050      |
| CAMI_low, CAMI_medium, toy_medium, toy_high  | 0.0283          | 15.203      |
| CAMI_low, CAMI_medium, CAMI_high, toy_high   | 0.0216          | 13.765      |
| CAMI_low, CAMI_medium, CAMI_high, toy_medium | 0.0209          | 14.078      |

## Appendix D: Proof of upper bound on maximum chain length

We show that the maximum chain length within a cluster of size  $m$  is bounded above by  $1 + \lfloor m/2 \rfloor$  using induction. First, note that this holds for  $m = 1$ : if a cluster contains one node, then that one node will directly point to the cluster ID and the chain has length 1. Now assume that the statement holds for clusters of size at most  $m - 1$ , that is, the longest chain in a cluster of size  $m - 1$  is of length  $1 + \lfloor (m - 1)/2 \rfloor$ . Consider a cluster of size  $m$ , which we denote as cluster  $A$ . This cluster was formed by merging two clusters, say clusters  $B$  and  $C$  with  $m_B$  and  $m_C$  nodes,  $m_B \leq m/2$ ,  $m_C \geq m/2$ . Note that by assumption, since  $m_C < m$ , the length of the longest chain in cluster  $C$  is bounded by  $1 + \lfloor m_C/2 \rfloor$ . From these two clusters, we redirected the pointer of the head of the cluster with the shortest maximum chain, let's say that this chain has length  $l$ . The maximum chain in the new cluster has length  $l + 1$  by construction. By assumption, the length of the maximum chain in cluster  $B$  does not exceed  $1 + \lfloor m_B/2 \rfloor$ , and thus  $l \leq 1 + \lfloor m_B/2 \rfloor$ . For  $m = 2$  we have  $m_B = m_C = 1$  and for  $m = 3$  we have  $m_B = 1$  and  $m_C = 2$ , which both gives  $1 + \lfloor m_B/2 \rfloor = 1 = \lfloor m/2 \rfloor$ . When  $m \geq 4$  we can write:

$$1 + \lfloor m_B/2 \rfloor \leq 1 + \lfloor m/4 \rfloor \leq \lfloor m/2 \rfloor.$$

Hence for any  $m > 1$  we have  $l \leq \lfloor m/2 \rfloor$  and the maximum chain in the new cluster has a length of at most  $1 + \lfloor m/2 \rfloor$ .

## Appendix E: Comparison of clustering methods on small datasets

Table S5. Clustering results for small read datasets obtained with MetaCluster 5.0, Abundancebin and OGRE. \* Could not finish the clustering procedure within two months. MetaCluster 5.0 and Abundancebin allow the user to pre-specify the number of clusters. In the table, “known no. clusters” indicates the results obtained when providing the tool with the correct number of clusters, “unknown no. clusters” shows the results when the tool was not provided with a pre-specified number of clusters.

| Dataset                  | Evaluation metric                        | MetaCluster 5.0    |                      | Abundancebin       |                      | OGRE    |
|--------------------------|------------------------------------------|--------------------|----------------------|--------------------|----------------------|---------|
|                          |                                          | known no. clusters | unknown no. clusters | known no. clusters | unknown no. clusters |         |
| 2species_a               | % reads clustered for species ID 220     | 0                  | 0                    | 100                | 100                  | 3.2     |
|                          | % reads clustered for species ID 294     | 0.7                | 0.7                  | 100                | 100                  | 98.8    |
|                          | No. clusters that contain species ID 220 | 0                  | 0                    | 2                  | 1                    | 56      |
|                          | No. clusters that contain species ID 294 | 2                  | 10                   | 2                  | 1                    | 333     |
|                          | Mean no. species per cluster [range]     | 1 [1,1]            | 1 [1,1]              | 2 [2,2]            | 2 [2,2]              | 1 [1,1] |
|                          | Total number of clusters                 | 2                  | 10                   | 2                  | 1                    | 389     |
| 2species_b               | % reads clustered for species ID 294     | 0.6                | 0.6                  | n.a.*              | n.a.*                | 98.8    |
|                          | % reads clustered for species ID 340     | 1.1                | 0.9                  | n.a.*              | n.a.*                | 98.9    |
|                          | No. clusters that contain species ID 294 | 1                  | 4                    | n.a.*              | n.a.*                | 332     |
|                          | No. clusters that contain species ID 340 | 1                  | 5                    | n.a.*              | n.a.*                | 1       |
|                          | Mean no. species per cluster [range]     | 1 [1,1]            | 1 [1,1]              | n.a.*              | n.a.*                | 1 [1,1] |
|                          | Total number of clusters                 | 2                  | 9                    | n.a.*              | n.a.*                | 333     |
| 4species                 | % reads clustered for species ID 126     | 0.3                | 0.3                  | 100                | n.a.*                | 99.7    |
|                          | % reads clustered for species ID 220     | 0                  | 0                    | 100                | n.a.*                | 3.2     |
|                          | % reads clustered for species ID 223     | 0                  | 0                    | 100                | n.a.*                | 99.9    |
|                          | % reads clustered for species ID 340     | 0.8                | 0.7                  | 100                | n.a.*                | 99.9    |
|                          | No. clusters that contain species ID 126 | 1                  | 1                    | 4                  | n.a.*                | 25      |
|                          | No. clusters that contain species ID 220 | 0                  | 0                    | 3                  | n.a.*                | 56      |
|                          | No. clusters that contain species ID 223 | 0                  | 0                    | 4                  | n.a.*                | 2       |
|                          | No. clusters that contain species ID 340 | 3                  | 8                    | 4                  | n.a.*                | 1       |
|                          | Mean no. species per cluster [range]     | 1 [1,1]            | 1 [1,1]              | 3.75 [3,4]         | n.a.*                | 1 [1,1] |
| Total number of clusters | 4                                        | 9                  | 4                    | n.a.*              | 84                   |         |

## Appendix F: Computational performance

Table S6. Computational performance of OGRE.

| Dataset       | Runtime (CPU hours)        |            |       | Size of the overlap graph         |                       |
|---------------|----------------------------|------------|-------|-----------------------------------|-----------------------|
|               | Overlap graph construction | Clustering | Total | Number of edges ( $\times 10^9$ ) | Output file size (GB) |
| CAMI_mousegut | 2358                       | 243        | 2601  | 7.10                              | 301                   |
| CAMI_low      | 2118                       | 145        | 2263  | 8.10                              | 310                   |
| CAMI_medium   | 1853                       | 367        | 2220  | 7.04                              | 360                   |
| CAMI_high     | 291                        | 250        | 541   | 0.36                              | 19                    |
| toy_medium    | 1762                       | 291        | 2053  | 2.85                              | 137                   |
| toy_high      | 648                        | 24         | 672   | 2.33                              | 108                   |

Table S7. Performance of the logistic regression classifier. The training data for the dataset in column 1 is created by selecting 10,000 same species overlaps and 10,000 different species overlaps from each of the overlap graphs of the other four datasets. Test accuracy is obtained by applying the trained model to the overlap graph of the test dataset. The two right-most columns show the fraction of overlaps discarded by the logistic regression classifier.

| Test dataset | Classification accuracies |       | Fraction of overlaps discarded |                            |
|--------------|---------------------------|-------|--------------------------------|----------------------------|
|              | Train                     | Test  | Same species overlaps          | Different species overlaps |
| CAMI_low     | 0.715                     | 0.801 | 0.199                          | 0.935                      |
| CAMI_medium  | 0.775                     | 0.923 | 0.077                          | 0.446                      |
| CAMI_high    | 0.765                     | 0.891 | 0.109                          | 0.561                      |
| toy_medium   | 0.758                     | 0.925 | 0.075                          | 0.598                      |
| toy_high     | 0.772                     | 0.934 | 0.066                          | 0.483                      |

### Appendix G: Overlap length and Phred-based matching probability distributions

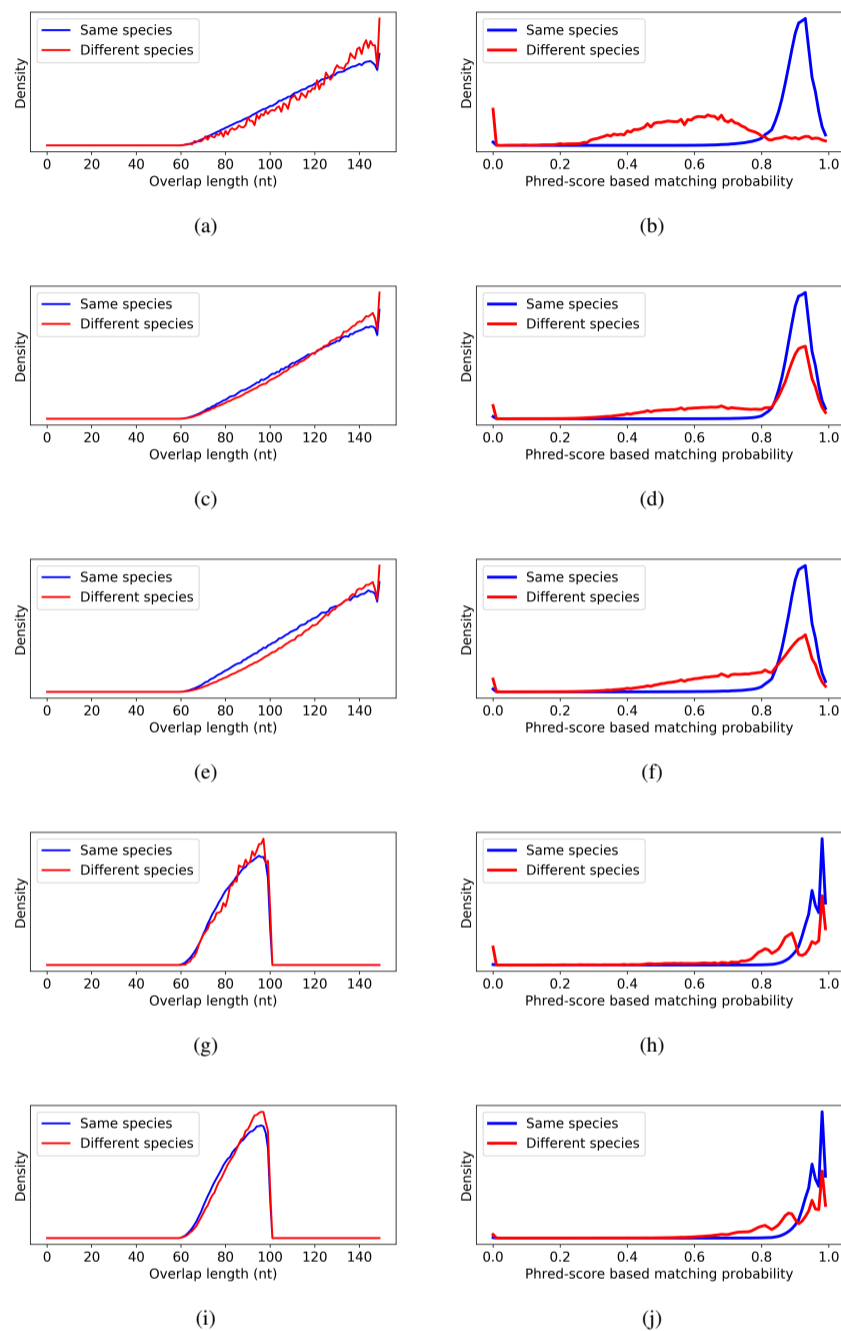

**Fig. S1.** Distribution of (a, c, e, g and i) the overlap length and (b, d, f, h and j) the Phred-based matching probability for 10,000 overlaps between reads from the same species and 10,000 overlaps between reads from different species selected from (a, b) CAML\_low, (c, d) CAML\_medium, (e, f) CAML\_high, (g, h) toy\_medium and (i, j) toy\_high. Note that two reads that are from the same species may originate from different strains.

## Appendix H: Clustering results

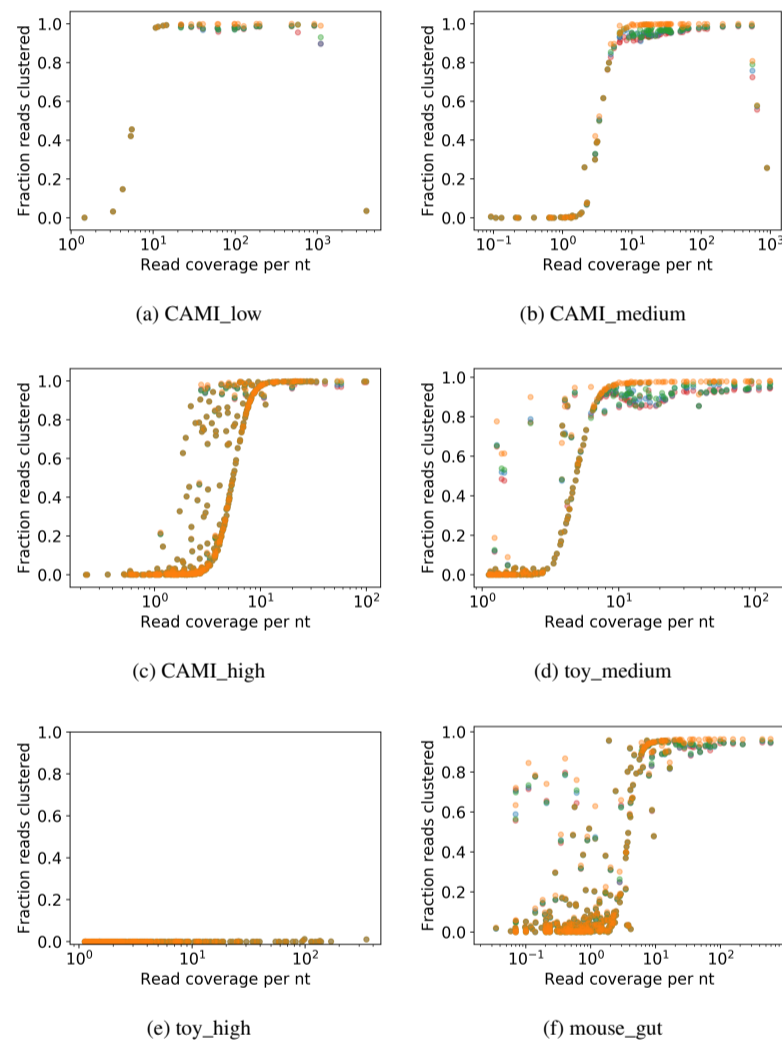

**Fig. S2.** Fraction of the reads that was clustered versus read coverage for (a) CAMI\_low, (b) CAMI\_medium, (c) CAMI\_high, (d) toy\_medium, (e) toy\_high, and (f) mouse\_gut. Each dot represents a species in the dataset. Results are presented for the four maximum allowed cluster sizes: 3,300 reads (red), 17,000 reads (blue), 33,000 reads (green) and no limit (orange). Note that for some species with extremely high coverage the number of clustered reads is low. These species are circular elements, which is something that Minimap2 has difficulties with.

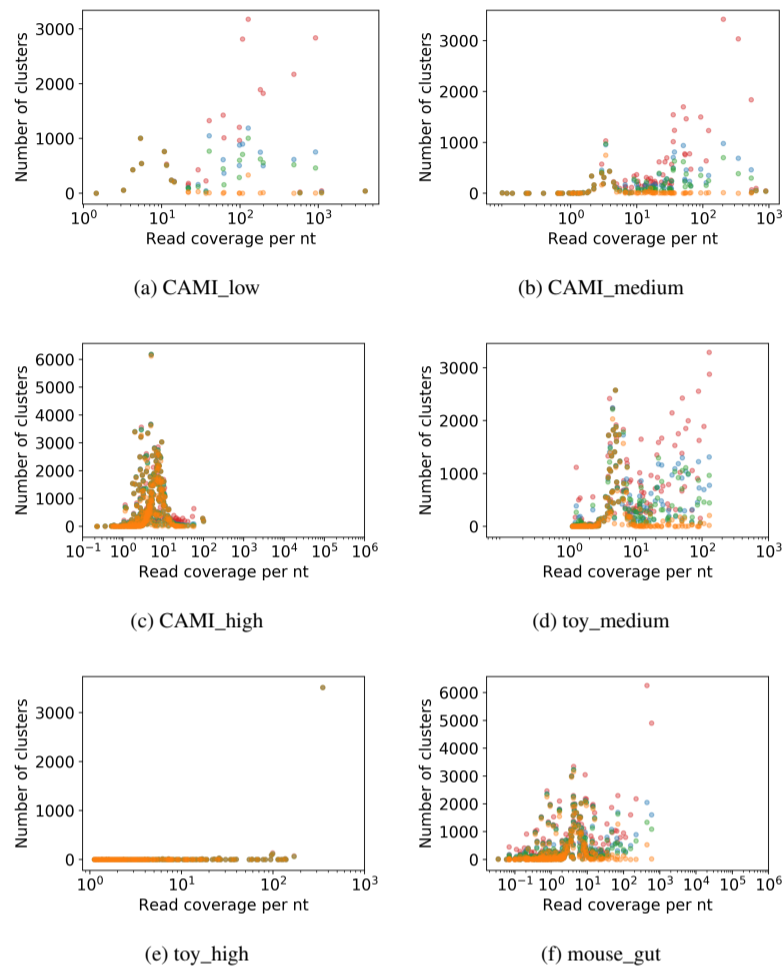

**Fig. S3.** The number of clusters that contain at least one read from a species versus read coverage for (a) CAMI\_low, (b) CAMI\_medium, (c) CAMI\_high, (d) toy\_medium, (e) toy\_high, and (f) mouse\_gut. Each dot represents a species in the dataset. Results are presented for the four maximum allowed cluster sizes: 3,300 reads (red), 17,000 reads (blue), 33,000 reads (green) and no limit (orange).

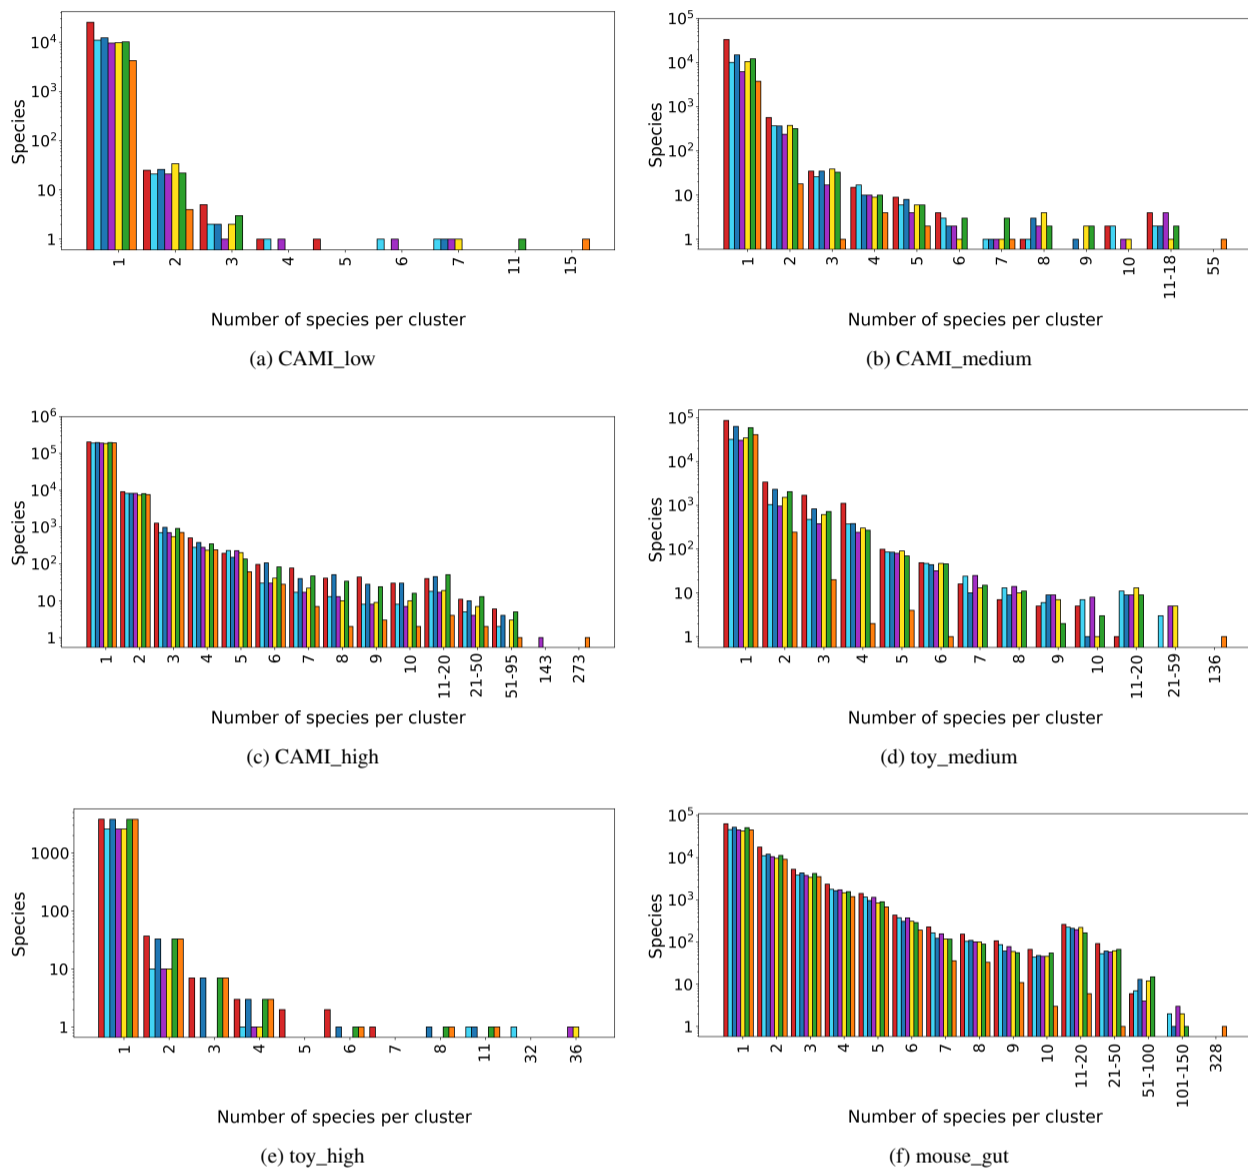

**Fig. S4.** Histograms of the number of species per cluster obtained with OGRE for a maximum cluster size of 3,300 reads (OGRE steps 1-3, red), 17,000 reads from 3,300 reads (OGRE steps 1-4, light blue), 17,000 reads (OGRE steps 1-3, dark blue), 33,000 reads from 3,300 reads (OGRE steps 1-4, purple), 33,000 reads from 17,000 reads (OGRE steps 1-4, yellow), 33,000 reads (OGRE steps 1-3, green) and unlimited (OGRE steps 1-3, orange). Results are shown for (a) CAMI\_low, (b) CAMI\_medium, (c) CAMI\_high, (d) toy\_medium, (e) toy\_high, and (f) mouse\_gut.

### Appendix I: Genes that reads from multi-species clusters map to

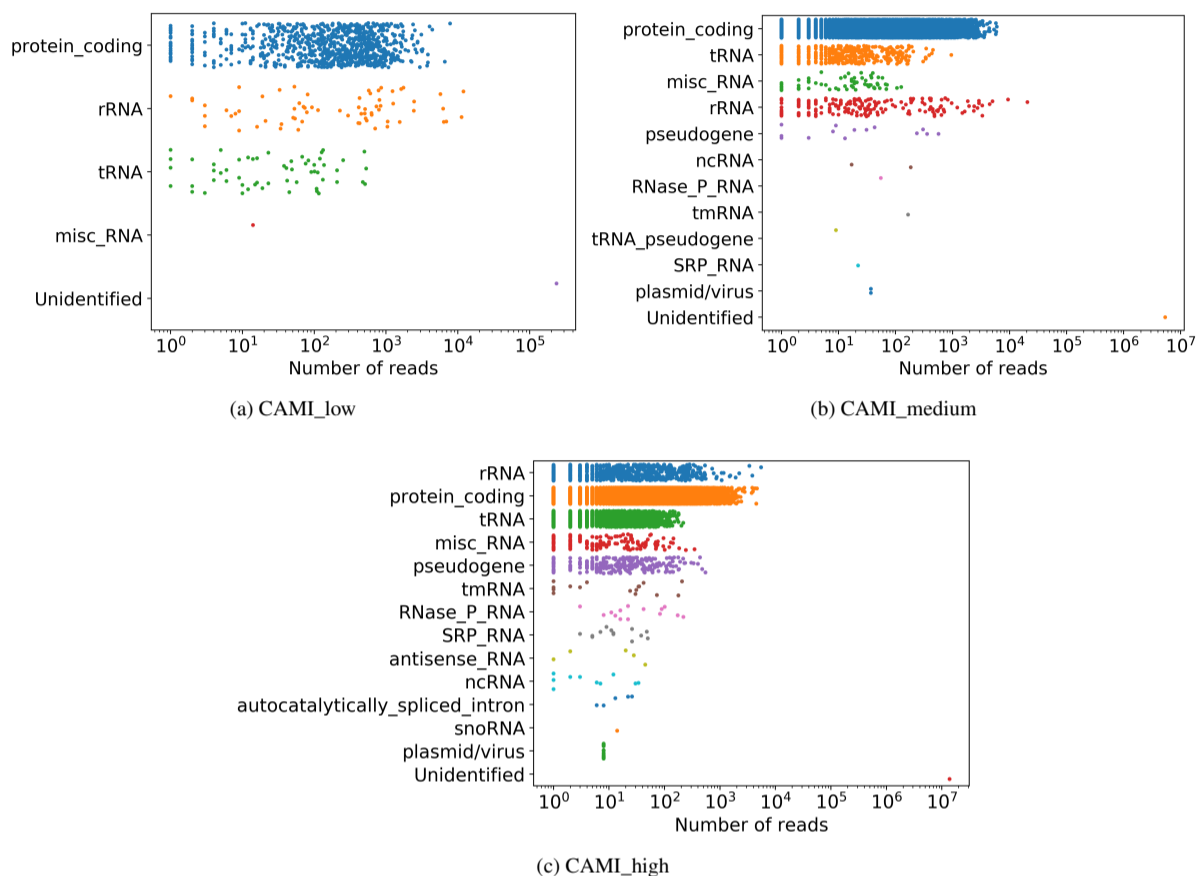

Fig. S5. Reads from all clusters that contain at least two species were mapped to the source genome. This figure shows the type of genes that these reads map to.

### Appendix J: Assembly results

Table S8. Assembly results for SPAdes (?) applied to the original data without clustering (“None”) and applied to clustered data. Two clustering approaches were compared: a random clustering with the same number of clusters as OGRE came up with, and a clustering obtained with OGRE. SPAdes was applied to clustered data using a three-step approach: (1) cluster reads, (2) assemble the reads for each cluster separately, and (3) assemble the reads using SPAdes where the contigs obtained in step (2) are used as a guide. Partially unaligned length is the number of unaligned bases in those contigs that were only partially aligned with the reference genome.

| Clustering method          | CAMI_low |        |        | CAMI_medium |        |        | CAMI_high |         |         | CAMI_mousegut |            |            |
|----------------------------|----------|--------|--------|-------------|--------|--------|-----------|---------|---------|---------------|------------|------------|
|                            | None     | Random | OGRE   | None        | Random | OGRE   | None      | Random  | OGRE    | None          | Random     | OGRE       |
| Genome fraction (%)        | 78.5     | 82.0   | 79.6   | 58.8        | 59.6   | 60.4   | 54.9      | 56.2    | 55.2    | 38.4          | 38.7       | 38.7       |
| N50                        | 50,399   | 51,155 | 69,015 | 32,857      | 30,625 | 72,244 | 2,549     | 2,572   | 3,508   | 6,719         | 6,528      | 9,908      |
| NA50                       | 46,136   | 46,974 | 60,749 | 30,483      | 28,508 | 63,764 | 2,355     | 2,399   | 3,294   | 4,367         | 4,303      | 5,778      |
| # Misassemblies            | 874      | 970    | 854    | 3,993       | 4,240  | 3,138  | 85,113    | 77,223  | 72,123  | 36,700        | 35,912     | 34,589     |
| # Mismatches per 100 kbp   | 327.0    | 449.8  | 355.1  | 386.5       | 415.3  | 375.2  | 922.1     | 989.2   | 960.3   | 759.1         | 779.0      | 780.2      |
| Partially unaligned length | 4,574    | 4,106  | 698    | 13,486      | 14,454 | 18,149 | 797,245   | 783,572 | 630,866 | 16,752,856    | 16,378,152 | 19,090,321 |
